# Supplementary material for: Research priorities in α1-antitrypsin deficiency: results of a patients' and healthcare providers' international survey from the EARCO Clinical Research Collaboration
Source: PubMed Central journal article supplement — ERJ Open Res. 2020 Dec 21;6(4):00523-2020. doi: 10.1183/23120541.00523-2020 (PMC7792815; doi:10.1183/23120541.00523-2020), 2020-12-21

# Alpha-1 antitrypsin deficiency (AATD) Patient survey

EARCO CRC

**Data comparison:**

Responses from those living in countries with AATD therapy reimbursement and those living in countries where AATD therapy is not reimbursed

May 2020

## RESPONSES FROM THOSE LIVING IN COUNTRIES WITH AATD THERAPY REIMBURSEMENT AND THOSE LIVING IN COUNTRIES WHERE THERAPY IS NOT REIMBURSED

### About the respondents

124 survey responses from people living in the following non-reimbursed countries: Australia, Denmark, Finland, Ireland, Norway, Sweden and United Kingdom were compared with 239 survey responses from people living in the following reimbursed countries: Argentina, Austria, France, Germany, Italy, Portugal, Spain, Switzerland and United States of America.

### Who were the respondents?

**Non-reimbursed:** 86% (n=107) identified as a person diagnosed with AATD and 14% (n=17) identified as a parent, relative or caregiver of someone with AATD.

**Reimbursed:** 81% (n=194) identified as a person diagnosed with AATD and 19% (n=45) identified as a parent, relative or caregiver of someone with AATD.

### Gender

**Non-reimbursed:** 63% female (n=78), 35% male (n=44) and 2% prefer not to say (n=2)

**Reimbursed:** 55% female (n=132), 45% male (n=107).

### Age

**Non-reimbursed:** respondents were aged between 1 and 82 years with the mean age of respondents 54 years and the median age 52 years.

**Reimbursed:** respondents were aged between 1 and 82 years with the mean age 52 years and the median age 48 years.

### Smoking

**Non-reimbursed** (n=119): 66% (n=78) were a former smoker, 31% (n=27) never smoker, 3% (n=4) current smoker.

**Reimbursed** (n=225): 56% (n=126) were a former smoker, 42% (n=94) never smoker, 2% (n=5) current smoker.

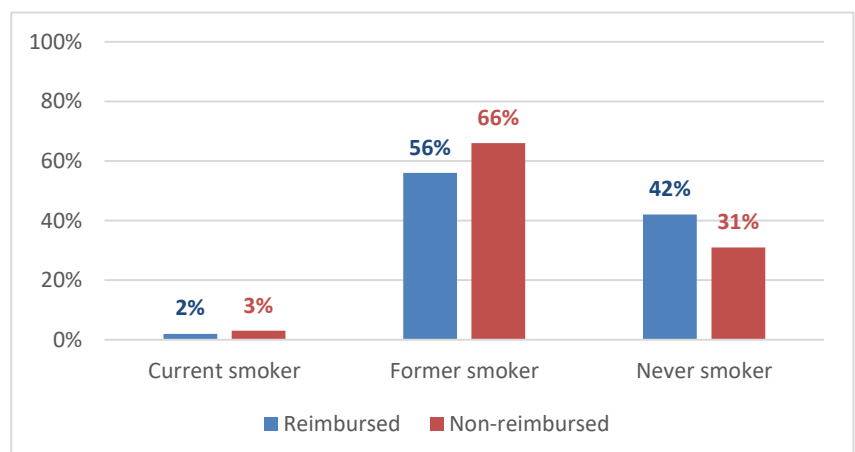

## Alcohol

**Non-reimbursed** (n=119): 58% (n=69) drink alcohol and 42% (n=50) do not drink.

**Reimbursed** (n=222): 51% (n=113) drink alcohol and 49% (n=109) do not drink.

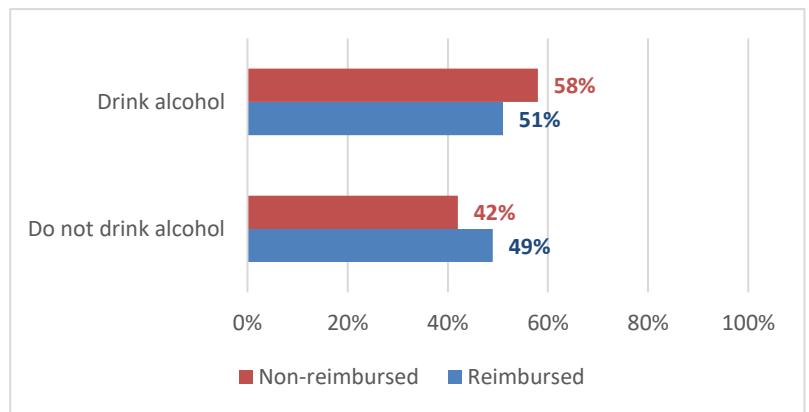

## Environmental exposure

**Non-reimbursed** (n=119): 70% (n=83) said No they were not exposed to gases, fumes or dust in their professional activities and 30% (n=36) said Yes they were.

**Reimbursed** (n=225): 69% (n=156) said No they were not exposed to gases, fumes or dust in their professional activities and 31% (n=69) said Yes they were.

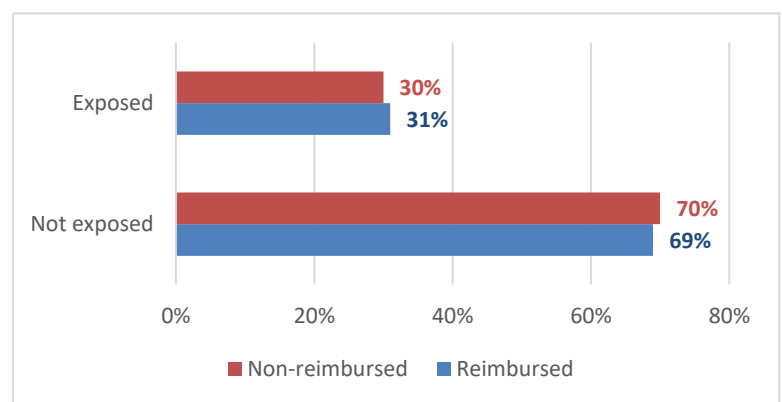

## Transplants

**Non-reimbursed (n=119)**: 1% (n=1) of respondents had a liver transplant and 2% (n=2) respondents had a lung transplant.

**Reimbursed (n=225)**: 1% (n=3) of respondents had a liver transplant and 1% (n=3) had a lung transplant.

## Who diagnosed you?

**Non-reimbursed (n=119)**: 47% (n=56) Pulmonologist/respiratory specialist; 32% (n=38) Family physician/GP; 6% (n=7) Gastroenterologist; 4% (n=5) Paediatrician; 11% (n=13) Other.

**Reimbursed (n=214)**: 58% (n=125) Pulmonologist/respiratory specialist; 14% (n=29) Family physician/GP; 9% (n=19) Gastroenterologist; 7% (n=14) Paediatrician; 12% (n=27) stated Other.

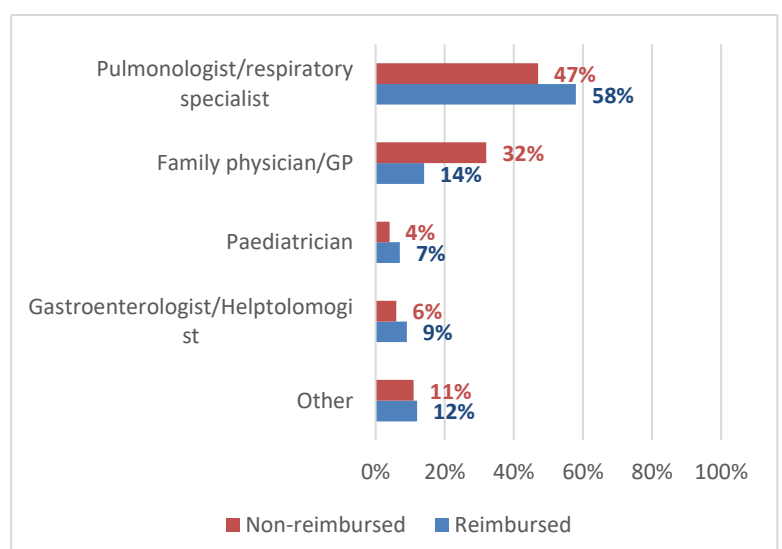

## Reason for diagnosis

**Non-reimbursed (n=119):** The three most common reasons for diagnosis were: 26% (n=31) COPD; 21% (n=25) Family testing; 12% (n=14) Asthma.

**Reimbursed (n=225):** The three most common reasons for diagnosis were: 30% (n=68) COPD; 20% (n=45) Family testing; 10% (n=23) Chest infections.

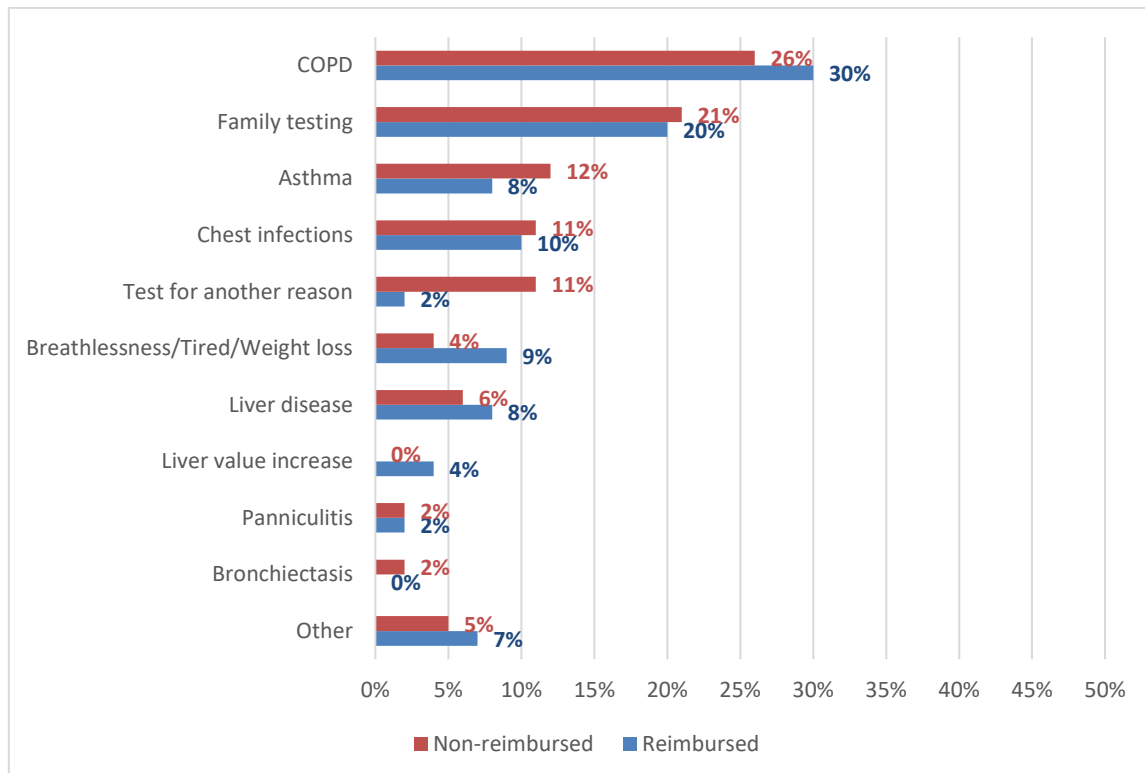

## Phenotype

**Non-reimbursed (n=119):** Most respondents 63% are ZZ (n=75)

**Reimbursed (n=224):** Most respondents 72% are ZZ (n=161)

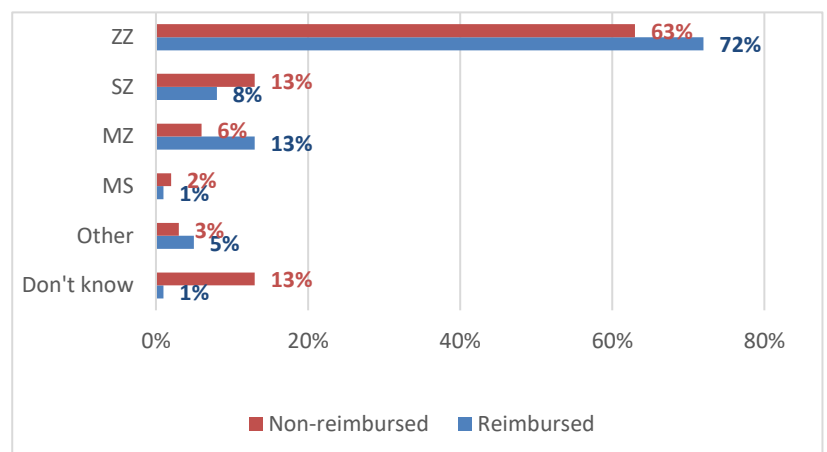

## How long since diagnosis?

**Non-reimbursed (n=119):** The length of time since diagnosis ranged from 'less than 1 year' to 45 years with the mean length being 10 years and the median length being 6 years.

**Reimbursed (n=222):** The length ranged from 'less than 1 year' to 59 years with the mean length being 11 years and the median length 8 years.

## Your experience of AATD

### Most challenging aspects to manage during the past 12 months.

**Non-reimbursed:** 1. Decreased exercise tolerance 2. Shortness of breath 3. Not feeling fit or have strength for daily activities

**Reimbursed:** 1. Decreased exercise tolerance 2. Shortness of breath 3. Not feeling fit for activities

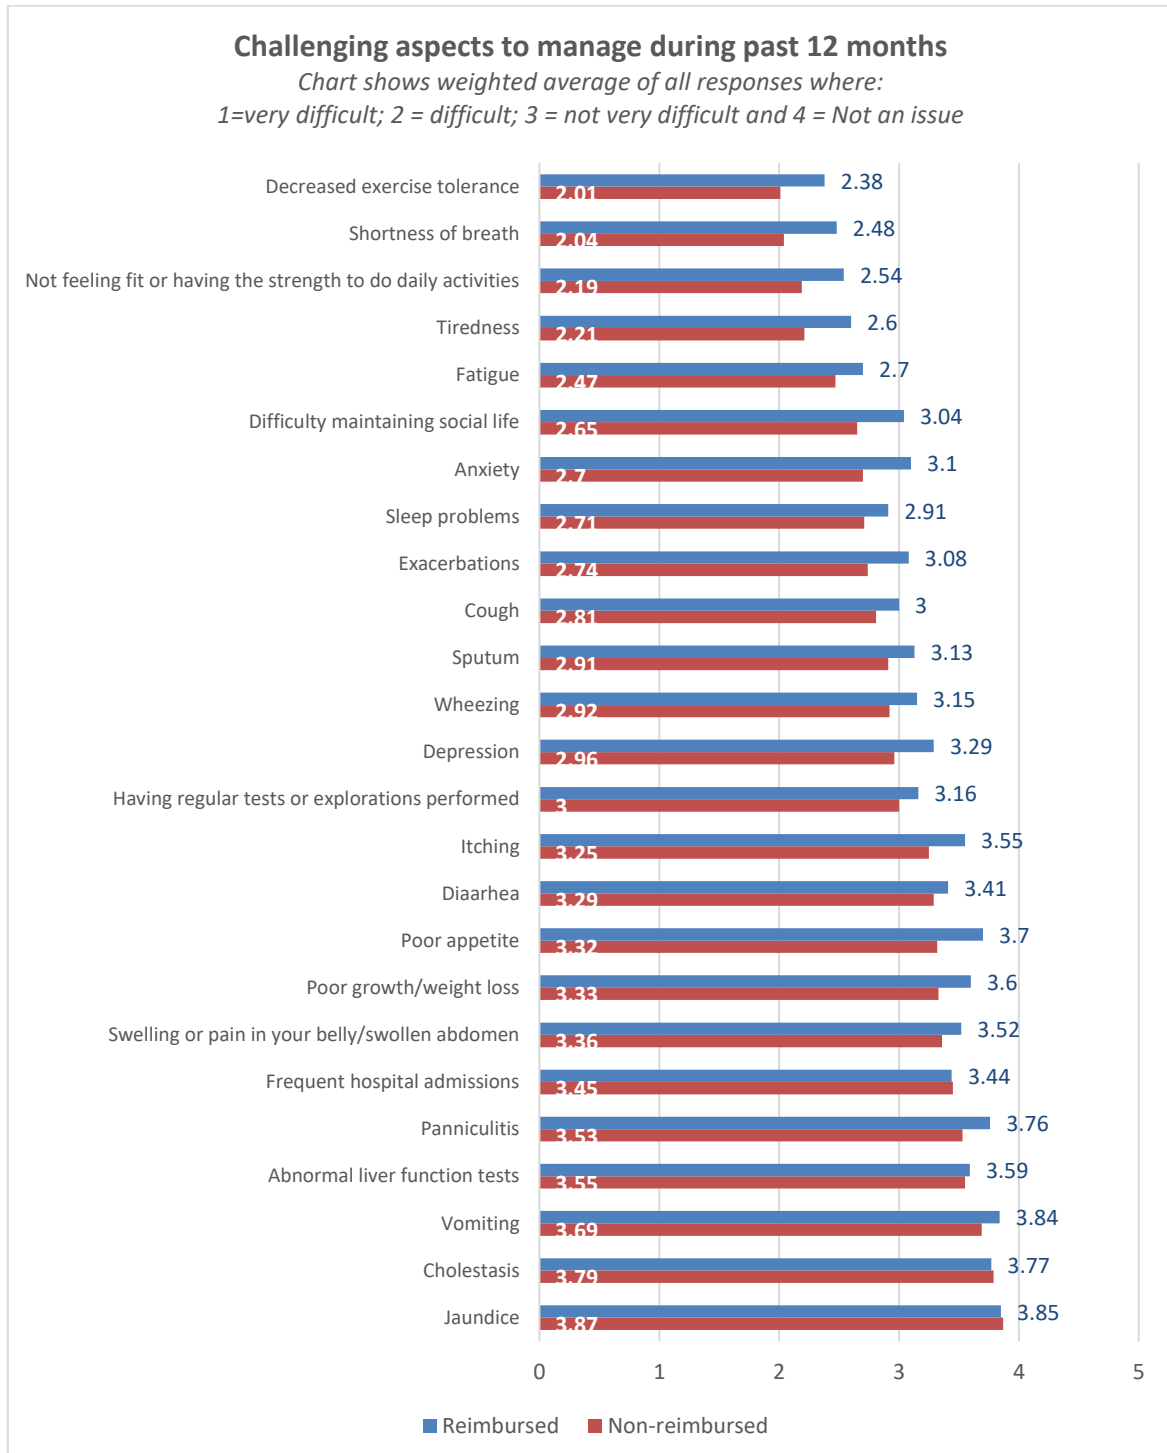

## Most challenging aspects/barriers for treatment

### Non-reimbursed:

1. Access issues to augmentation therapy in your healthcare system (1.64)
2. Hospital administration of augmentation therapy (2.07)
3. Time consumed in augmentation therapy (2.43)

### Reimbursed:

1. Access to maintenance classes / fitness centers to maintain fitness after rehabilitation (2.61)
2. Access to pulmonary rehabilitation (2.64)
3. Impact of transplant in patients and their families (2.73)

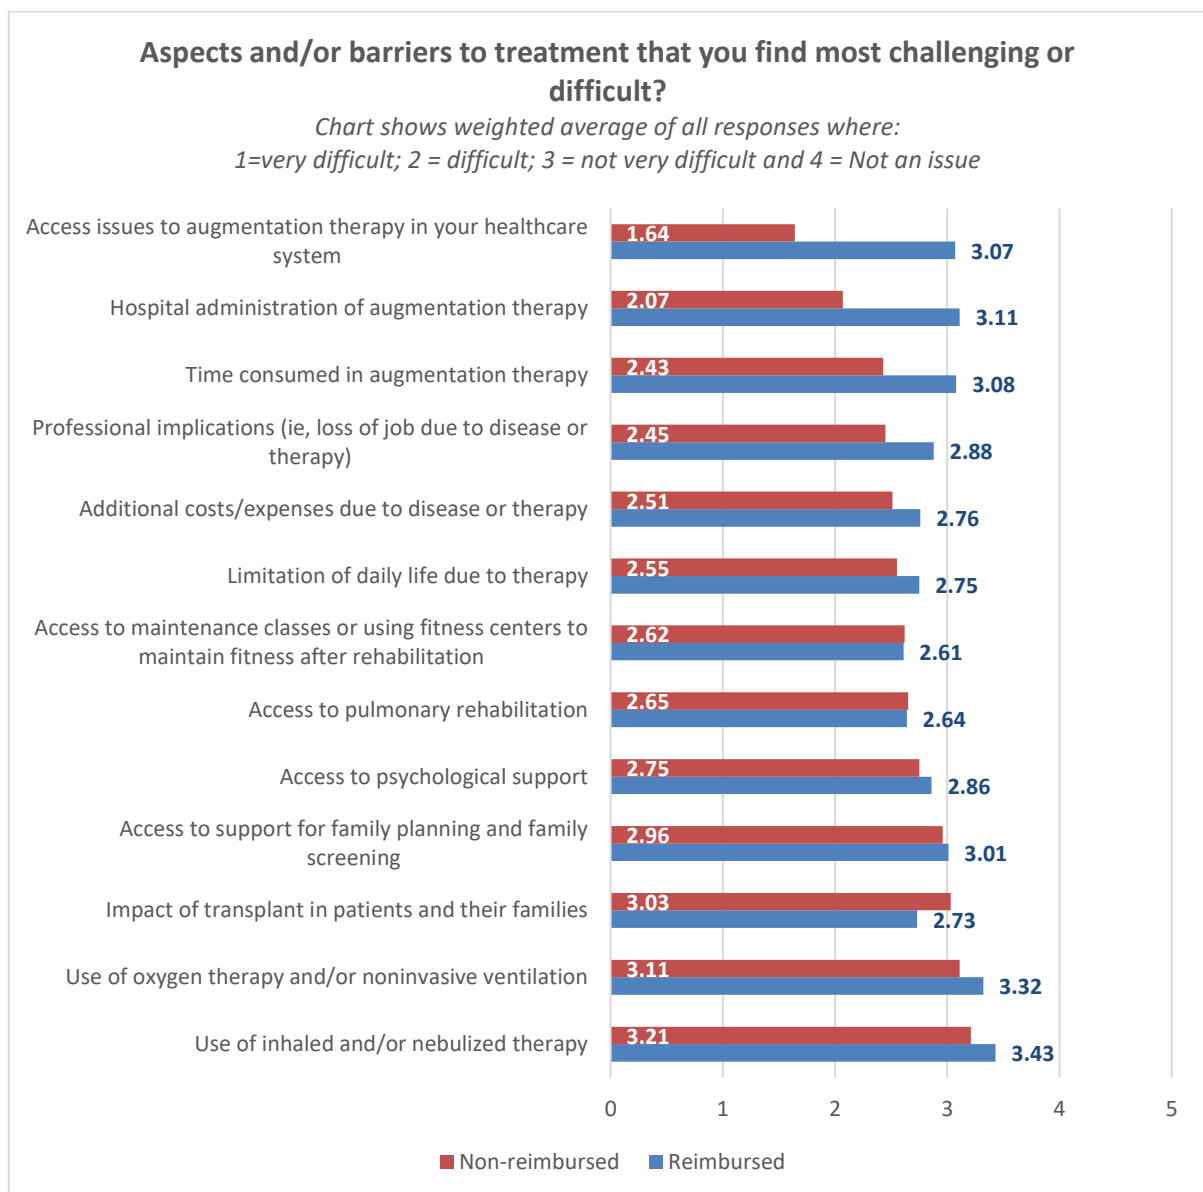

## Research prioritisation

### Improving AATD management - The most important research areas:

#### Non-reimbursed:

1. Relationship between AATD and other diseases (94%)
2. More evidence on effectiveness of Aug Therapy (94%)
3. Evidence on the effect of augmentation therapy on reducing exacerbations (92%)

#### Reimbursed:

1. Alternatives to IV augmentation therapy (94%)
2. More evidence on effectiveness of augmentation therapy (92%)
3. Different evolution of the disease among patients (91%)

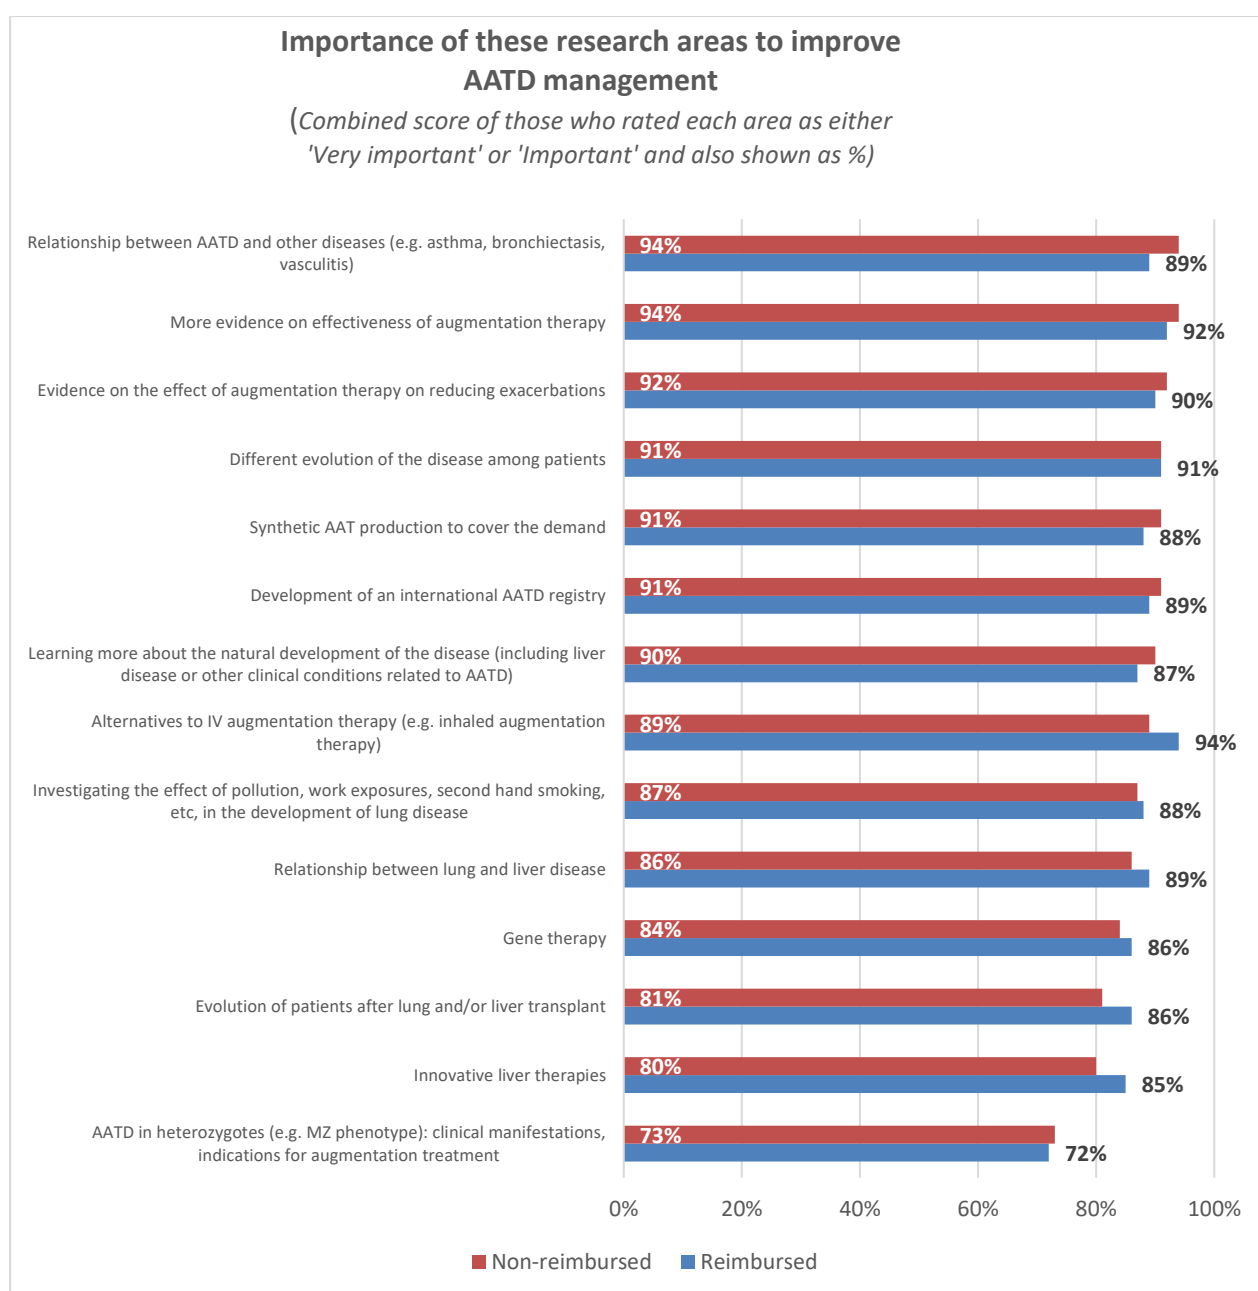

## Improving diagnosis and awareness of AATD

### Non-reimbursed:

1. Improving knowledge of AATD in particular among GPs (99%)
2. Educational programs for regional/national resources to diagnose/refer patients (96%)
3. Education for physicians on diagnostic techniques, algorithm & results (95%)

### Reimbursed:

1. Improving knowledge of AATD in particular among GPs (99%)
2. Targeted screening programs: COPD and Asthma patients (99%)
3. Education for physicians on diagnostic techniques, algorithm & results (97%)

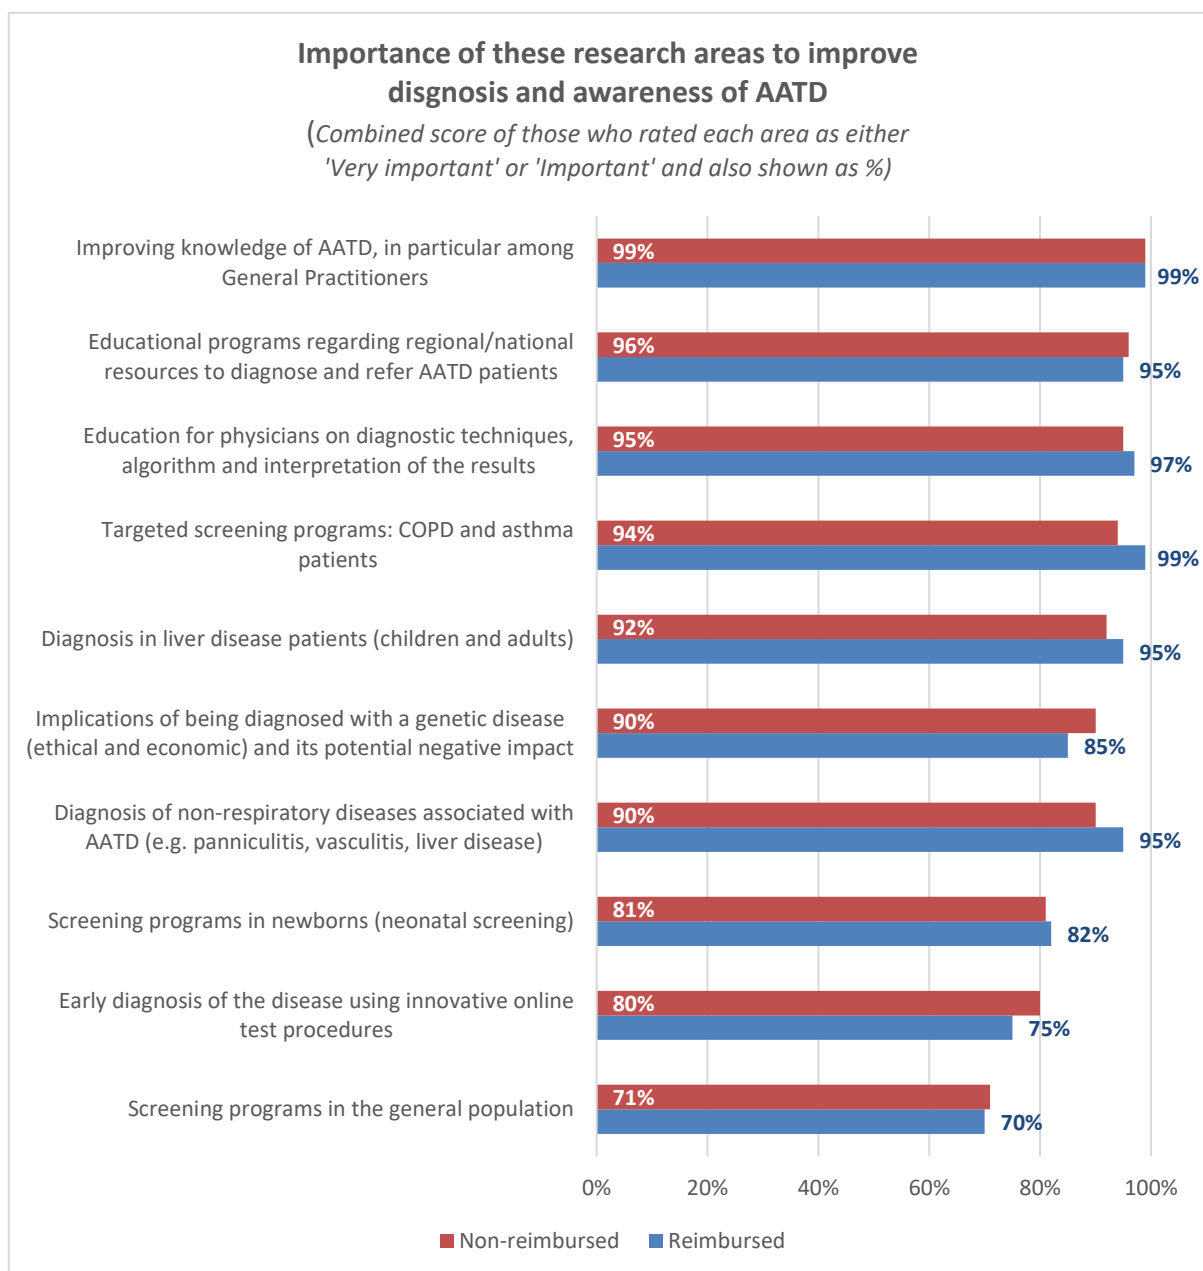



## How important do you think it is to improve the following areas for AATD treatment?

### Non-reimbursed:

1. Use of vaccines to prevent exacerbations (93%)
2. Role of nutrition / Availability of organ donation (both 91%)
3. Role of pulmonary rehabilitation (89%)

### Reimbursed:

1. Smoking cessation (96%)
2. Role of pulmonary rehabilitation (95%)
3. Develop other aspects of integral care (94%)

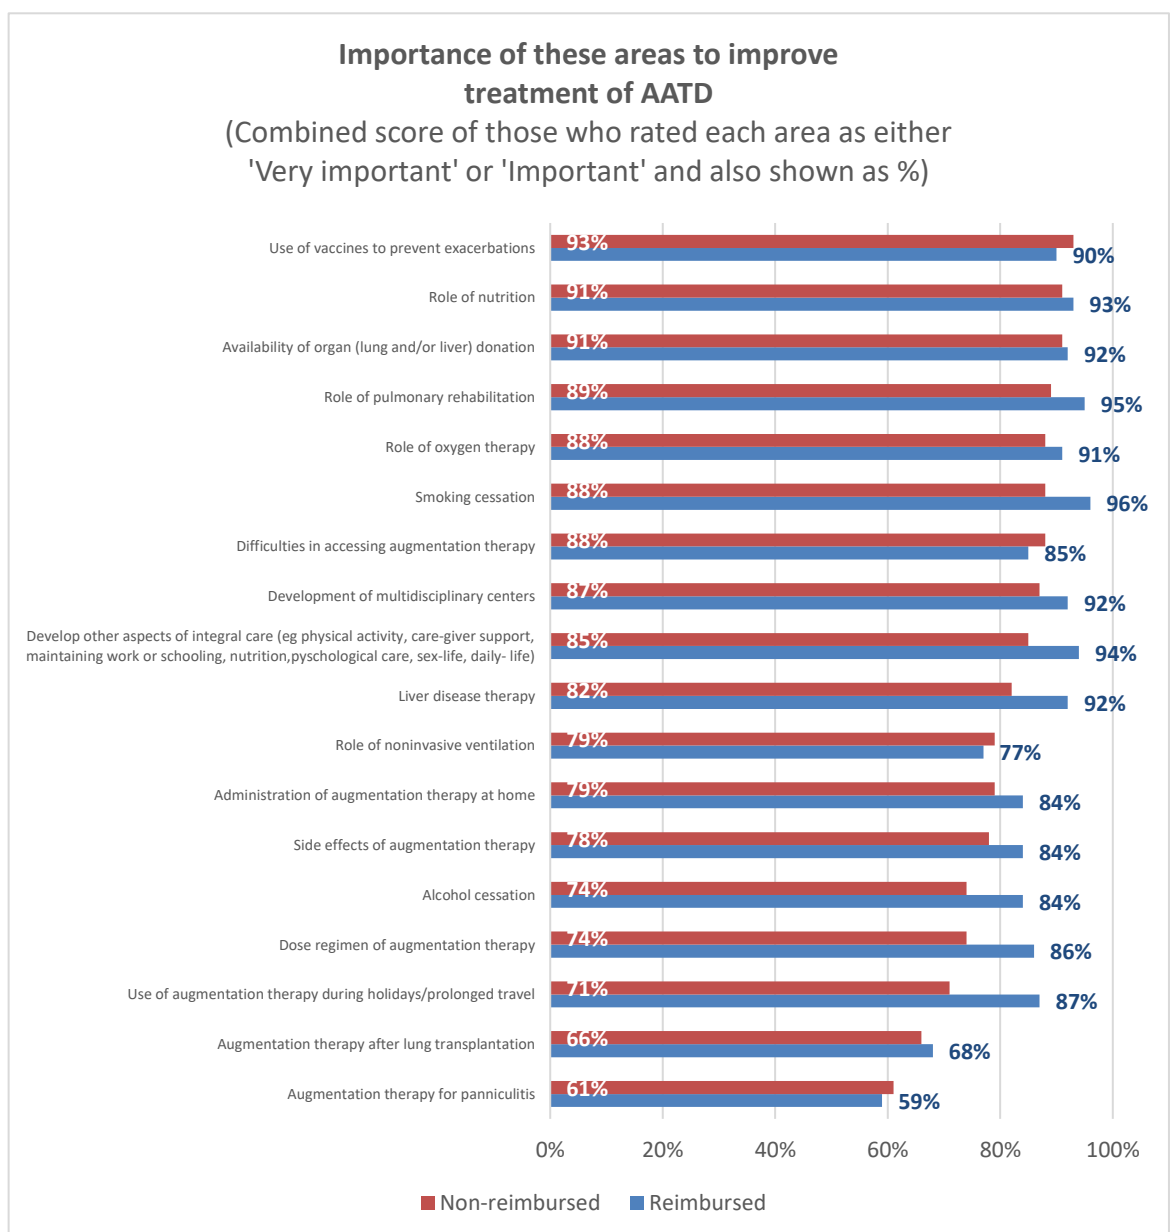

## Self-management and education

### Non-reimbursed:

1. Having access to AATD specialized centres (99%)
2. Having access to reliable, easy to understand information about AATD (99%)
3. Having an action plan for exacerbations and easy access to healthcare (99%)

### Reimbursed:

1. A personalised integrated care plan including therapeutic physical activity (98%)
2. Being able to recognise an exacerbation (97%)
3. Regular communication between healthcare professional and AATD patient (97%)

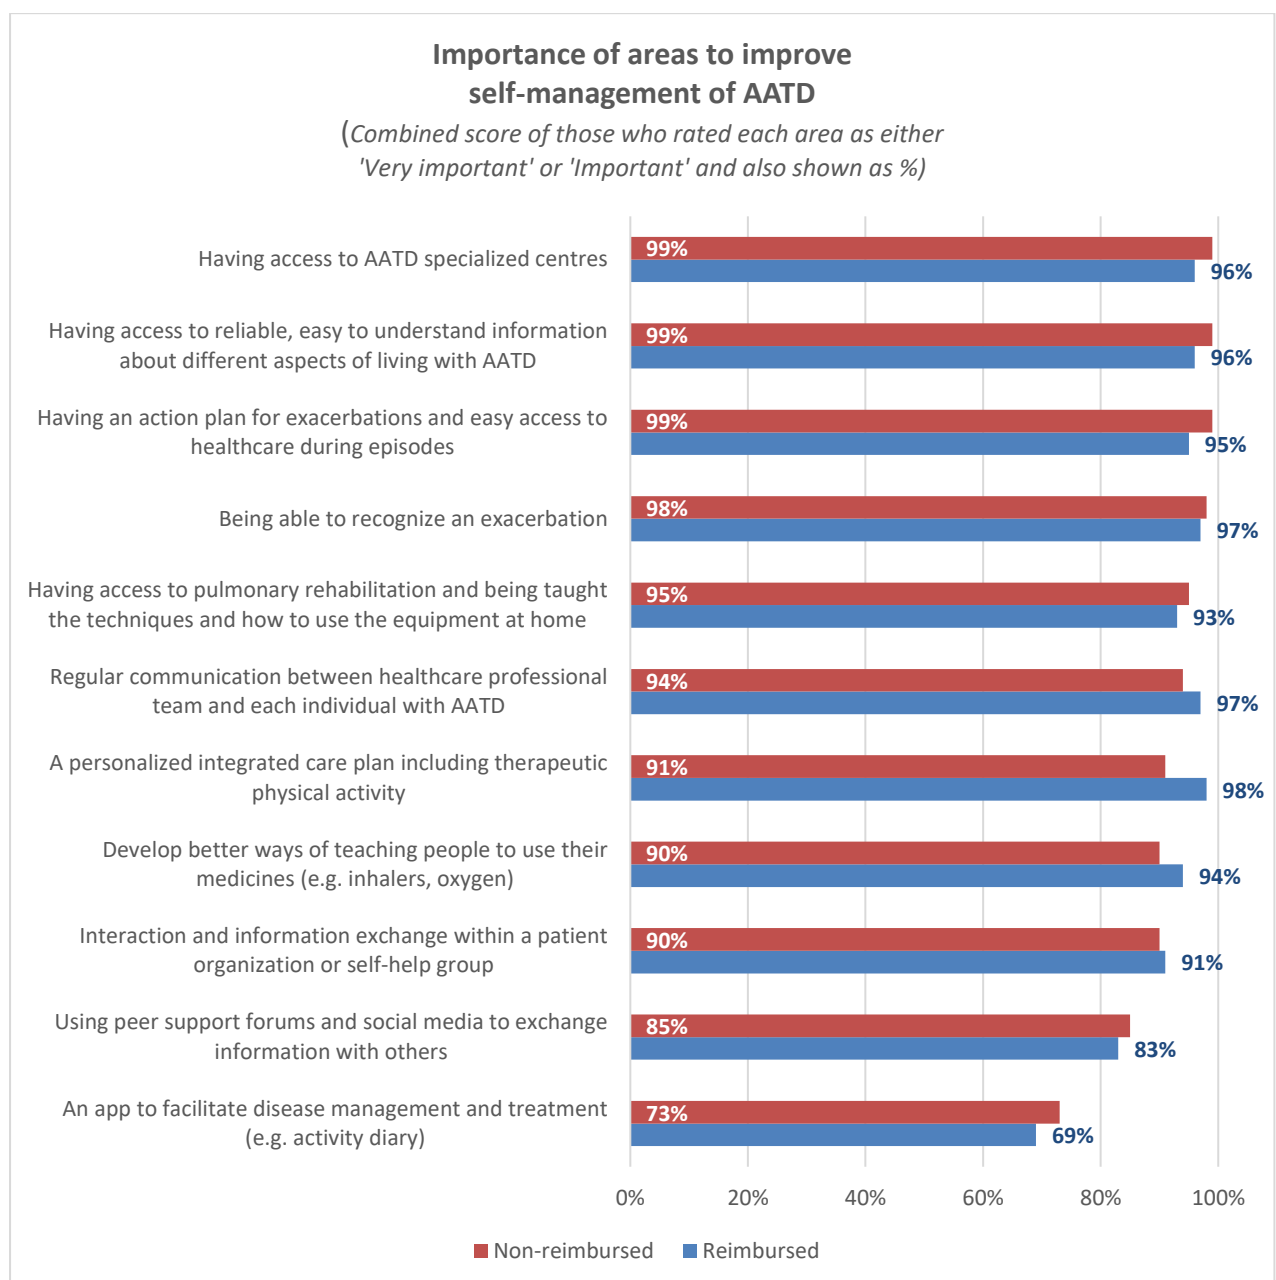

Supplement: 00523-2020.supplement_S5.pdf [file 00523-2020.supplement_S5.pdf]
